1     **Title: Next-generation ABACUS biosensors reveal cellular ABA dynamics**  
2                     **driving root growth at low aerial humidity**

3     **Authors:** James Rowe<sup>1</sup>, Mathieu Grangé-Guermente<sup>1</sup>, Marino Exposito-Rodriguez<sup>1</sup>, Rinukshi  
4         Wimalasekera<sup>1</sup>†, Martin Lenz<sup>1,2</sup>, Kartika Shetty<sup>1</sup>, Sean R. Cutler<sup>3</sup>, Alexander M. Jones<sup>1\*</sup>

5     **Affiliations:**

6         <sup>1</sup> Sainsbury Laboratory, University of Cambridge; 47 Bateman Street, Cambridge CB2 1LR,  
7         United Kingdom

8         <sup>2</sup> Cambridge Advanced Imaging Centre, University of Cambridge, Anatomy Building,  
9         Downing Site, Cambridge CB2 3DY, United Kingdom

10        <sup>3</sup>Center for Plant Cell Biology & Institute for Integrative Genome Biology and Department  
11        of Botany and Plant Sciences, University of California, Riverside, Riverside, CA, 92521,  
12        USA.

13        † Current address: Department of Botany, University of Sri Jayewardenepura, Nugegoda, Sri  
14        Lanka

15        \*Corresponding author. Email: [alexander.jones@slcu.cam.ac.uk](mailto:alexander.jones@slcu.cam.ac.uk)

16     **Abstract:** The plant hormone abscisic acid (ABA) accumulates under abiotic stress to recast wa-  
17     ter relations and development. To overcome a lack of high-resolution, sensitive reporters, we de-  
18     veloped ABACUS2s, next-generation FRET biosensors for ABA with high affinity, signal-to-  
19     noise ratio and orthogonality, that reveal endogenous ABA patterns in *Arabidopsis thaliana*. We  
20     mapped stress-induced ABA dynamics in high-resolution to reveal the cellular basis for local and  
21     systemic ABA functions. At reduced foliar humidity, roots cells accumulated ABA in the elon-  
22     gation zone, the site of phloem transported ABA unloading. Phloem ABA and root ABA signal-  
23     ling were both essential to maintain root growth at low humidity. ABA coordinates a robust sys-  
24     tem to maintain root growth in response to foliar stresses, enabling plants to maintain foraging of  
25     deeper soil for water uptake

29 **Main Text:**

30 Plant decision making is distributed rather than centrally coordinated, but to survive and over-  
31 come stresses such as a lack of water, responses must also be systemically coordinated. Abscisic  
32 acid (ABA) is a phytohormone that accumulates systemically under various local water stresses  
33 to coordinate responses over a complex and often-large morphology. When roots experience  
34 low-water stress, for example, ABA closes the microscopic pores on leaves (stomata), to limit  
35 systemic water loss<sup>1-3</sup>. Interestingly, leaf water loss can cause changes in root growth responses  
36 and architecture - increasing transpiration genetically or through increased airflow produces  
37 larger root systems in *Arabidopsis*<sup>4</sup> and low relative humidity (RH) can promote root growth in  
38 many species<sup>5-7</sup>. Although a molecular mechanism remains elusive, it has been proposed that  
39 ABA, acting as a dehydration signal, could be coordinating these root growth responses<sup>4,8</sup>. The  
40 sites of ABA biosynthesis, metabolism and translocation are the subject of intensive research,  
41 but progress has been hampered by limitations in tools to quantify accumulation and depletion of  
42 ABA on a tissue/cellular scale where regulatory decisions controlling ABA dynamics are made  
43<sup>9,10</sup>. The availability of sensitive reporters, particularly Förster Resonance Energy Transfer  
44 (FRET) biosensors, for hormones, second messengers and metabolism are revolutionizing plant  
45 development, signalling and photosynthesis research<sup>11</sup>. Such biosensors are powerful tools to  
46 quantify metabolites *in vivo* at high spatiotemporal resolution<sup>11</sup>, including phytohormones under  
47 changing environmental conditions<sup>12-16</sup>. Direct ABA FRET biosensors that do not require addi-  
48 tional signalling components have broad application potential beyond ABA quantification in  
49 plant cells and sub-cellular compartments. For example in ABA synthesizing pathogenic fungi<sup>17</sup>,  
50 in human granulocytes where ABA is a cytokine<sup>18</sup>, or in extracts from organisms where genetic  
51 modification is difficult using purified protein *in vitro*<sup>19</sup>. However, existing ABA FRET biosen-  
52 sors, ABAleons and Abscisic Acid Concentration and Uptake Sensors 1 (ABACUS1s)<sup>13,14,20</sup>,  
53 lack the full complement of strengths required to easily quantify ABA. Therefore, we engineered  
54 next-generation ABA biosensors and deployed them to dissect cellular ABA dynamics and mobi-  
55 lization in response to foliar humidity stress and to establish a systemic role for ABA to maintain  
56 local root growth in response to a distant shoot stress.

57 In ABAleons and ABACUS1 biosensors, ABA sensory domains are connected by linkers to a  
58 pair of fluorescent proteins (FP) (Extended Data Fig.1). The orientation and distance between  
59 these FPs determines the transfer of excitation energy via FRET from a donor FP to an acceptor  
60 FP. Ligand-induced conformational changes in sensory domains alter the relative positions of

61 the FPs, which can be detected by exciting the donor and measuring a change in relative acceptor  
62 and donor emissions, hereafter referred to as emission ratio change.

63 ABAlcons are sensitive to endogenous ABA concentrations, but have poor signal-to-noise ratios  
64 (small emission ratio change). ABACUS1s have high signal-to-noise ratio but poor sensitivity  
65 for endogenous ABA<sup>13,14</sup>. Ideal biosensors are also orthogonal with minimal interaction with  
66 endogenous signalling. ABAlcons have strong ABA hyposensitivity phenotypes while  
67 ABACUS1s have minor ABA hypersensitivity phenotypes<sup>13,14,21</sup>. We used ABACUS1-2 $\mu$  as the  
68 basis to engineer next-generation biosensors with high sensitivity, emission ratio change and  
69 orthogonality (Extended Data Fig.2).

70 ABACUS1-2 $\mu$  has a  $K_D$ (ABA) of  $\sim 2$   $\mu$ M and consists of an N-terminal FRET acceptor  
71 (edCitrine), an attB1 linker, a sensory domain consisting of a mutated **PYRABACTIN**  
72 **RESISTANT 1 LIKE 1 (PYL1 H87P)** ABA receptor and a truncated **PROTEIN**  
73 **PHOSPHATASE 2C (PP2C)** co-receptor, **ABSCISIC ACID INSENSITIVE 1 aba** interacting  
74 **domain (ABI1aid)**, an attB2 linker, and a C-terminal FRET donor (edCerulean)<sup>14</sup>. We  
75 introduced a second PYL1 mutation (A190V) into ABACUS1-2 $\mu$  that is known to increase ABA  
76 affinity of PYL1<sup>22</sup>. The resulting ABACUS had increased affinity but reduced emission ratio  
77 change *in vitro* (Fig 1. a, b, Extended Data Fig.2, Extended Data Table 1).

78 Engineering increased emission ratio change is semi-empirical as mutations in any moiety may  
79 boost the transduction of ligand-binding into FRET change, but a first target is often the linkers  
80 between sensory domain and the FRET pair<sup>23</sup>. Replacing the attB linkers with shorter, less  
81 flexible, proline linkers rescued emission ratio change of the A190V mutant (Fig 1b, Extended  
82 Data Fig.2, Extended Data Table 1).

83 A higher-affinity PYL1 receptor would likely exacerbate ABA hypersensitivity phenotypes of  
84 ABACUS expressing plants<sup>14</sup>. Therefore, we introduced an orthogonalizing mutation, PYL1  
85 S112A (Fig 1b, c), to reduce PYL1 signalling through endogenous co-receptors (e.g. ABI1,  
86 ABI2, and HAB1)<sup>24</sup>. Because this mutation disrupts PYL1 interaction with ABI1 residues E142  
87 and G180 that are absent in the ABI1aid truncation of ABACUSs (Fig 1c), we correctly  
88 predicted PYL1 S112A would not lower emission ratio change or affinity (Fig 1b, Extended  
89 Data Fig.2).

90 We next incorrectly predicted that truncating the flexible fluorescent protein termini facing the  
91 sensory domain (edCitrineT9, T7edCerulean) would increase ratio change further (Fig 1b,  
92 Extended Data Fig.2, Extended Data Table 1). Nonetheless, emission ratio change could be  
93 restored along with further affinity improvements by introducing either of two separate  
94 mutations to a PYL1 region – the “latch” - that is important for both PYL1-ABA and PYL1-  
95 PP2C interactions <sup>25</sup>. We selected the first mutation, PYL1 R143S, to alter water mediated  
96 PYL1-ABA-ABI1aid interactions. This produced our highest ratio change biosensor that has  
97 ABA sensitivity suitable for *in planta* studies, which we named **ABACUS2-400n** ( $K_D$  (ABA):  
98 445 nM, *in vitro* emission ratio change: +71% , Fig 1 b, d, Extended Data Fig. 1, 2, Extended  
99 Data Table 1). The second mutation, PYL1 E141D, inspired by sequences of the high-affinity  
100 PYL8 and PYL9 ABA receptors, produced a high ratio-change sensor with our highest affinity,  
101 which we named **ABACUS2-100n** ( $K_D$ (ABA): 98 nM, *in vitro* emission ratio change: +67%, Fig  
102 1b, d, e, Extended Data Fig 1, 2, 3, Extended Data Fig 1). *In vitro* assays against other  
103 phytohormones, salts and ABA related compounds demonstrated that ABACUS2 sensors are  
104 highly for specific for ABA and the ABA agonist Pyrabactin (Extended Data Fig 4).

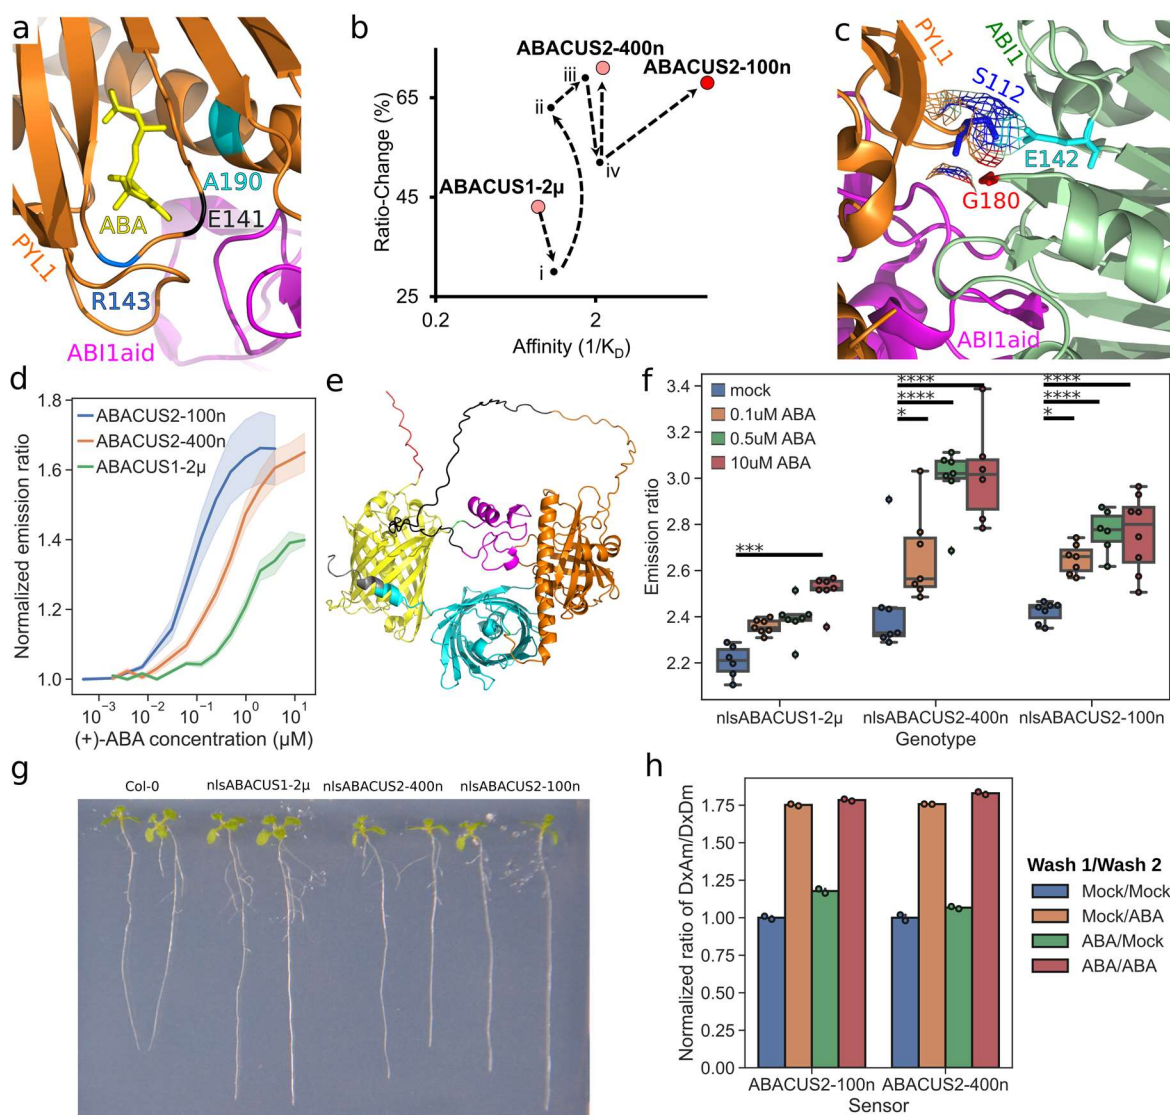

105  
106  
107 **Fig. 1. ABACUS2-100n and ABACUS2-400n offer higher ratio change and affinity than ABACUS1 and**  
108 **moderate phenotypes.** a) Location of binding site mutations ABA binding site (A190V, E141D, R143S) mapped  
109 onto crystal structure PDB: 3JRQ. b) Affinity vs ratio change of ABACUS variants. Intermediate sensor versions are  
110 as follows: i. ABACUS1-2 $\mu$ A190V, ii. ABACUS1-2 $\mu$ A190V PPP-L52-P linkers iii ABACUS1-2 $\mu$ A190V PPP-  
111 L52-P linkers S112A, iv ABACUS1-2 $\mu$ A190V, PPP-L52-P linkers, S112A, edCitrineT9 edCeruleanT7 c) The  
112 ABI1-PYL1 interface. S112 (blue) interacts with residues in ABI1 (light green) but not the ABI1aid (magenta). From  
113 crystal structure PDB: 3JRQ. d) Purified protein emission ratio titration of (+) - ABA for ABACUS variants. Line  
114 indicates mean of multiple independent extractions and titrations, shaded region indicates the standard error of the  
115 mean. ABACUS1-2 $\mu$  (n=6), ABACUS2-400n (n=16) and ABACUS2-100n (n=13). e) Illustrative  
116 Collabfold/Alphafold MMseqs2prediction of ABACUS2-100n structure. Domains are: nuclear localization signal  
117 (red), edCitrineT9 (yellow) ABI1aid(ABI1 49 aa truncation, magenta), PYL1(H87P, S112A, A190V, E141D), L52  
118 linker (black), T7edCerulean (cyan) myc tag (dark red). Structural alignment with PDB: 3JRQ of ABA-PYL1-ABI1  
119 is available in the supplement. f) nlsABACUS emission ratio responses in *Arabidopsis* roots exposed for 30 minutes  
120 to various concentrations of ABA. Each point indicates median nuclear emission ratio for an individual root z-stack.  
121 Representative images are available in Extended Data Fig. 3. 2-way ANOVA, (sensor: F=64.9, P<0.0001, DF=2;  
122 Treatment F=37.91, P<0.0001, DF=3; Interaction: F=3.349, P=0.0059 DF=6) Asterisks indicate significance with a  
123 Tukey post hoc test \*:p<0.05, \*\*:p<0.01, \*\*\*:p<0.001, \*\*\*\*:p<0.0001, n=6,7,8,7,8,7,6,6,7,7,6,8 respectively g)  
124 Visual phenotypes at 11 days after stratification (DAS) of nlsABACUS1- $\mu$ , nlsABACUS2-400n line 7 and  
125 nlsABACUS2-100n line 7 h) *in vitro* reversibility testing of purified ABACUS2-400n and ABACUS2-100n sensors.  
126 n=2

127

128 Improved promoter/terminator combinations allowed us to express ABACUS2 sensors with  
129 nuclear localization signals (nls) in wildtype *Arabidopsis thaliana* (Col-0), overcoming our  
130 previously severe ABACUS1 silencing problems<sup>14</sup>. Nuclear localization allows easy  
131 discrimination of the fluorescence of neighbouring cells and the exclusion of non-nuclear  
132 background and auto-fluorescence during image processing<sup>11</sup>. To accelerate this image  
133 processing, we developed a comprehensive image analysis toolset to quickly analyse confocal  
134 stacks in 3D/4D, allowing us to robustly quantify and visualize nuclear emission ratios within  
135 moments (See supplemental methods and<sup>26</sup>).

136 In Col-0, nlsABACUS2-400n and nlsABACUS2-100n respond strongly at lower concentrations  
137 of exogenous ABA than ABACUS1-2 $\mu$  (Fig 1f, Extended Data Fig. 5), confirming their  
138 improved sensitivity *in planta*. The ABACUS2 emission ratio changes are significantly larger  
139 than ABACUS1-2 $\mu$ <sup>14</sup> or other state-of-the-art ABA sensors (ABAleonSD1-3L21)<sup>21</sup> (Fig 1f,  
140 Extended Data Fig. 5, 6). Even though our new nlsABACUS2 lines had 5 – 25-fold higher  
141 affinity than previous nlsABACUS1-2 $\mu$  lines, phenotypes are relatively mild (Fig 1g, Extended  
142 Data Fig. 7, 8). Without exogenous ABA, nlsABACUS-400n germinates normally, and  
143 nlsABACUS2-100n is slightly delayed (Fig. 1g, Extended Data Fig. 7), however both display  
144 robust post germination root growth. With ABA, nlsABACUS2 lines display a hypersensitive  
145 germination inhibition ( Extended Data Fig. 7), but wildtype-like root growth (Extended Data  
146 Fig. 8) suggesting that the ABACUS2 PYL1 is likely somewhat active *in planta*, but the PYL1  
147 S112A orthogonalizing mutation successfully reduced ABACUS2 PYL1 interaction with  
148 endogenous PP2Cs.

149 Both ABACUS2 sensors were rapidly reversible *in vitro* (Fig 1 h) and nlsABACUS2-400n  
150 emission ratios decreased rapidly following a 50  $\mu$ M ABA pulse (Fig 2a, b) delivered to roots  
151 growing in the RootChip microfluidics system<sup>12,27</sup>.

152 To determine if the increased affinity of ABACUS2s allows them to reliably measure  
153 endogenous variations in ABA levels, unlike the lower sensitivity ABACUS1 sensors, we  
154 undertook a pharmacological and inducible-genetics approach. The ABA biosynthesis inhibitor  
155 fluridone reduced nlsABACUS2 emission ratios, but nlsABACUS1-2 $\mu$  remained level (Fig 2c,  
156 S9). Inducing ABA catabolism with CYTOCHROME P450, FAMILY 707, SUBFAMILY A,



157 POLYPEPTIDE 3 (CYP707A3<sup>28</sup>) overexpression reduced nlsABACUS2 emission ratios (Fig  
158 2d, Extended Data Fig. 10), and inducing ABA biosynthesis with 9-CIS-EPOXYCAROTENOID  
159 DIOXYGENASE 3 (NCED3) overexpression increased emission ratios (Fig 2e, Extended Data  
160 Fig. 11). Therefore, nlsABACUS2 sensors respond to physiological levels of ABA.

161 The availability of sensitive reporters for other phytohormones such as auxin revolutionized  
162 plant developmental biology, by revealing localized activity of a key hormone for  
163 morphogenesis and patterning<sup>11</sup>. Similarly, sites of ABA accumulation may give insights into  
164 developmental regulation and stress responses. Therefore, we used nlsABACUS2s to determine  
165 the distribution of ABA in *Arabidopsis* plants (Fig 2f, g, h, Extended Data Fig. 12).  
166 nlsABACUS2 seedlings had higher emission ratios in internal tissues of the cotyledons and  
167 hypocotyl, including the vasculature, indicating high ABA in these tissues.

168 High ABA in the shoot vasculature is significant, as the phloem companion cells are a key site  
169 for ABA biosynthesis<sup>29</sup> and ABA is thought to be transported in the phloem<sup>8</sup>. The phloem  
170 transports sugars, hormones and other metabolites from shoot to root, where it can be unloaded  
171 via the phloem-pole pericycle cells in the root elongation zone from two distinct vascular poles  
172<sup>30</sup>. nlsABACUS2 roots show high emission ratios in these tissues, (Fig 2g, Extended Data Fig.  
173 12) so we used Single Plane Illumination Microscopy (SPIM) to examine whether phloem  
174 sourced ABA is unloaded here (Fig 3a, b). Before treatment, nlsABACUS2-400n emission ratios  
175 were higher in two poles of the root vasculature, as would be predicted for a phloem-transported  
176 hormone (Fig 3b.). Root emission ratios increased rapidly following shoot ABA treatment,  
177 starting in vascular poles, then spreading radially through the elongation zone and longitudinally  
178 to the differentiation zone and mature root (Fig 3a, b) – matching patterns of when shoot applied  
179 fluorescent dyes are unloaded from the phloem<sup>30</sup>.

180

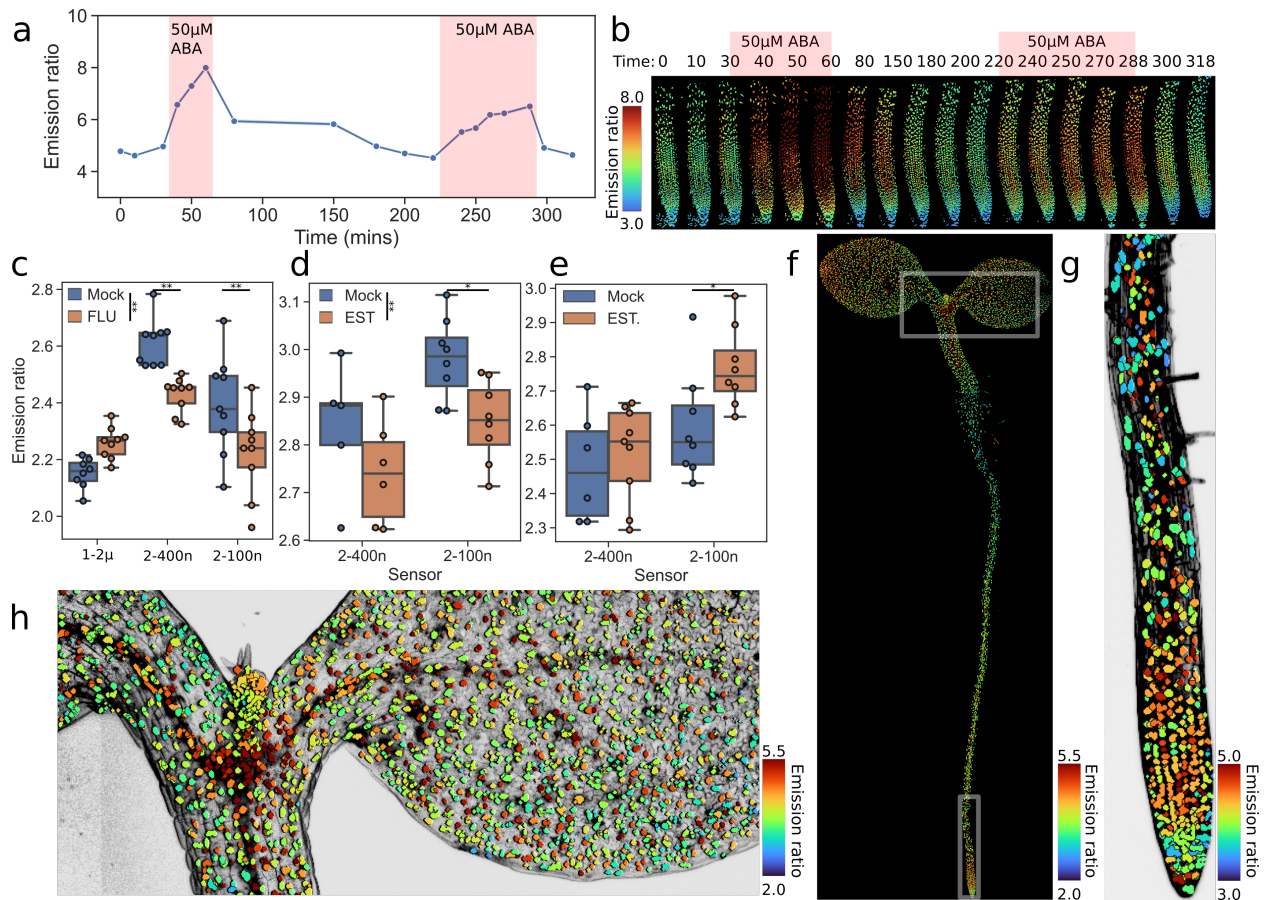

181

182

183 **Figure 2. ABACUS2-100n and ABACUS2-400n reveal endogenous ABA patterns, accumulations and**  
 184 **depletions** a) Graph and maximum intensity Z projection (b) of emission ratios of ABACUS2-400n roots  
 185 responding to 50µM exogenous ABA treatment pulses, performed with the RootChip microfluidics system. Number  
 186 of nuclei in each time point respectively: 996,1036,996, 856, 1020, 931, 875, 832, 935, 931, 974, 924, 931, 1003,  
 187 932, 972, 963, 1002 c) 24h fluridone treatment effect on emission ratios of nlsABACUS roots. Representative  
 188 images in Extended Data Fig. 9. 2-way ANOVA Treatment:  $F=7.4$ ,  $p=0.009$   $DF=1$ , Sensor  $F=38.0$   $p<0.0001$ ,  $DF=2$ ,  
 189 Interaction  $F=9.7$   $p=0.0003$ ,  $DF=2$ .  $n=8,9,9,9,9$  respectively A Tukey post hoc test was used for multiple  
 190 comparisons. d) 24 hour catabolism induction (10µM Estradiol, UBQ10::XVE:CYP707A3) reduced nlsABACUS2-  
 191 100n and nlsABACUS2-400n emission ratios in Arabidopsis roots. Representative images in Extended Data Fig.  
 192 10. 2-way ANOVA Treatment:  $F=8.1$ ,  $p=0.009$   $DF=1$ , Sensor  $F=9.9$   $p<0.0046$   $DF=1$ , Interaction  $F=0.2$   $p=0.660$ .  
 193  $DF=1$   $n=5,6,8,8$  respectively A Tukey post hoc test was used for multiple comparisons e) 24 hour biosynthesis  
 194 induction (5µM Estradiol, UBQ10::XVE:NCED3) increased nlsABACUS2-100n emission ratios in Arabidopsis  
 195 roots. Representative images in Extended Data Fig. 11. Each point indicates mean nuclear emission ratio for an  
 196 individual root z-stack. 2-way ANOVA Treatment:  $F=4.0$ ,  $p=0.055$ ,  $DF=1$ , Sensor  $F=4.84$   $p=0.037$ ,  $DF=1$ ,  
 197 Interaction  $F=2.0$   $p=0.167$ ,  $DF=1$ .  $n=6,9,8,8$  respectively. A Tukey post hoc test was used for multiple comparisons.  
 198 f) Nearest point Z-projection of whole plant nlsABACUS2-400n emission ratios. Boxes indicate approximate crops  
 199 of g and h. g) Nearest point Z-projection of nlsABACUS2-400n ratios in the root tip. Gray to black channel  
 200 represents propidium iodide counterstaining of cell walls. h) Nearest point Z-projection of ABACUS2-400n ratios in  
 201 the cotyledons and hypocotyl. Gray to black channel represents propidium iodide counterstaining of cell walls.  
 202 Asterisks indicate statistical significance \*:  $p<0.05$ , \*\*:  $p<0.01$ , \*\*\*:  $p<0.001$ , \*\*\*\*:  $p<0.0001$   
 203



204  
205 Exogenous ABA causes concentration-dependent promotion or inhibition of root growth<sup>31</sup>, so  
206 ABA from the phloem must be tightly regulated independently of local biosynthesis. The ab-  
207 scisic acid 8'-hydroxylases CYP707A1-4 catabolic enzymes have been implicated in eliminating  
208 ABA after stress<sup>32,33</sup>. *CYP707A1* and *CYP707A3* are the isoforms most expressed in the root<sup>28</sup>  
209 and *cyp707a1cyp707a3* double mutants<sup>34</sup> displayed a strong over-accumulation of ABA in the  
210 root tip (Extended Data Fig. 13). Exogenous ABA pulsing revealed larger emission ratio in-  
211 creases in *cyp707a1cyp707a3*, and considerably slower elimination than Col-0 (Fig 3c). Whilst  
212 these enzymes are critical to prevent over-accumulation of ABA in the root tip, other ABA de-  
213 pletion mechanisms must also contribute to the ABA elimination as there is still a slow reduction  
214 in *cyp707a1cyp707a3* nlsABACUS2-400n emission ratios following an ABA pulse (Fig 3c).

215 ABA has numerous roles protecting plants from abiotic stress, particularly osmotic and ionic  
216 stresses. During salt stress, root ABA responses mediate endodermal cell wall suberization<sup>35,36</sup>,  
217 limiting ion and water flow to protect the plant, however it's currently unclear which cells  
218 accumulate ABA. High-resolution imaging of ABACUS2-400n gave us an unparalleled view of  
219 the ABA accumulation after a six-hour 100mM NaCl stress (Fig 3f, g, Extended Data Fig. 14)  
220 allowing us to quantify which tissues accumulate ABA. Under salt stress, the stele (a site of  
221 ABA biosynthesis) and endodermis (a site of ABA dependent protective responses) of the  
222 differentiation/maturation zones accumulated more ABA than the surrounding epidermis and  
223 cortex tissues (Fig Extended Data Fig. 14).

224 Confident that we could image and detect cell type specific ABA accumulations, we decided to  
225 investigate the effect of humidity on plant ABA levels and responses in detail. A six-hour  
226 humidity drop increased emission ratios in stomata and pavement cells expressing  
227 nlsABACUS2-400n (Fig 3d, Extended Data Fig. 15), which coincided with a decreased stomatal  
228 aperture (Extended Data Fig. 15). Leaf humidity increases trigger expression of ABA catabolic  
229 genes *CYP707A1* and *CYP707A3*<sup>33</sup> and nlsABACUS2-400n emission ratios decreased following  
230 a humidity increase, and stomata opened (Fig 3e, Extended Data Fig. 16). Remarkably,  
231 nlsABACUS2-400n emission ratios responded similarly in pavement cells and stomatal cells to  
232 humidity changes (Fig 3e, Extended Data Fig. 16). ABA famously closes stomata, and along  
233 with the vasculature, stomata have been proposed as sites of ABA biosynthesis<sup>29,33,37</sup>, but little  
234 attention has been paid to whether pavement cells accumulate ABA. Such broad ABA increases

235 may indicate a systemic response that travels beyond the tissues responsible for fast local  
 236 responses.  
 237

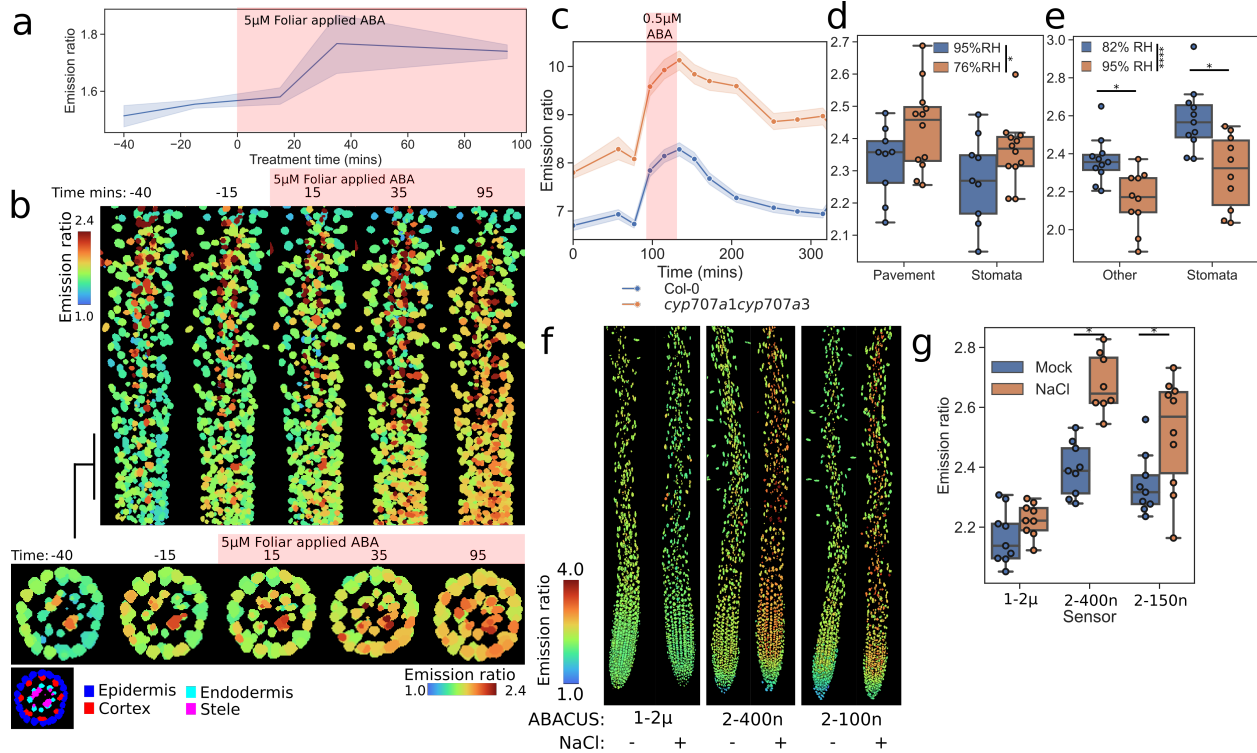

238  
 239  
 240 **Fig 3. ABA levels are high in the internal tissues of the cotyledons, the vasculature, and the root elongation**  
 241 **zone. Leaves and roots respond to local abiotic stresses with ABA accumulation.** a) SPIM microscopy of  
 242 nlsABACUS2-400n exposed to a 5µM ABA treatment to the foliar tissues. Roots are isolated from the foliar tissues  
 243 so emission ratio increases must come from ABA transport. Number of nuclei in each time point respectively:  
 244 458,488,476,481,466 b) Max Z projection and a Max Y projection of the indicated area of the data quantified in a).  
 245 c) nlsABACUS2-400n in Col-0 and *cyp707a1cyp707a3* emission ratios under ABA pulsing. N=9, 12, 9, 12  
 246 respectively d) nlsABACUS2-400n emission ratios increase in response to a 6 hour humidity decrease. Relative  
 247 humidity (RH) indicates the measured humidity at leaf height during the treatments. Representative images and  
 248 peristomatal distance are available in Extended Data Fig. 11. 2-way ANOVA Humidity F=6.29 p=0.0165 DF=1,  
 249 Cell type F=2.08 p=0.157 DF=1, Interaction F=0.0088 p=0.926 DF=1. n=11, 10, 11, 10 respectively. A Tukey post  
 250 hoc test was used for multiple comparisons e) nlsABACUS2-400n emission ratios decrease in response to a 6 hour  
 251 humidity increase. RH indicates the measured relative humidity at leaf height during the treatments. Representative  
 252 images and peristomatal distance are available in Extended Data Fig. 12. Each point indicates median nuclear  
 253 emission ratio for an individual z-stack. 2-way ANOVA (Treatment F=24.1, p<0.0001 DF=1; Cell type F=13.14, p=  
 254 0.0008 DF=1; interaction F=0.46 p=0.498 DF=1). A Tukey post hoc test was used for multiple comparisons f) and  
 255 g) ABACUS2 emission ratios in response to 6 hours 100mM NaCl treatment. 2-way ANOVA (Treatment F=30.6,  
 256 p<0.0001 DF=1; Cell type F=41.02, p<0.0001 DF=2; interaction F=4.43 p=0.017 DF=2). n=9, 9, 9, 8, 9, 10. A  
 257 Tukey post hoc test was used for multiple comparisons. Asterisks indicate statistical significance \*:p<0.05,  
 258 \*\*:p<0.01, \*\*\*:p<0.001, \*\*\*\*:p<0.0001  
 259

260 As foliar ABA levels increase following a humidity stress and foliar ABA can be transported to  
 261 the root (Fig 3a,b) <sup>8,38</sup>, we predicted that a local shoot stress may cause ABA accumulation in  
 262 roots, affecting root growth and development. Leaf transpiration rates can affect root growth and

263 morphology though an uncharacterized mechanism<sup>4</sup>, however root plasticity is strongly ABA  
264 regulated under salt and other local water stresses<sup>39,40</sup>.

265 We developed a system where leaves could be exposed to low humidity and roots would remain  
266 hydrated (Fig Extended Data Fig. 17) and maintain robust root growth (Fig 4a). Remarkably, the  
267 ABA biosynthesis mutant *aba2* suffered a strong root growth inhibition under low humidity (Fig  
268 4A) implying that ABA signalling functions to maintain root growth when foliar humidity is  
269 low, a scenario common in irrigation agriculture.

270 *nlsABACUS2-100n* roots displayed increased root emission ratios at low humidity, which were  
271 particularly prevalent in the elongation zone, the site of phloem unloading and a tissue critical for  
272 root growth (Fig 4b, c). We took a targeted genetic approach to determine if increases in root  
273 ABA are critical for plants to increase/maintain root growth at low humidity. ABA responses  
274 rely on the activity of the SnRK2 kinases SnRK2.2, SnRK2.3 and SnRK2.6/OPEN STOMATA  
275 1(OST1) which phosphorylate downstream transcription factors to activate gene expression<sup>41</sup>.  
276 *snrk2.2snrk2.3* mutants have ABA insensitive roots but can maintain normal stomatal function  
277 and closure responses under stress due to a functional SnRK2.6 protein, the principal SnRK2  
278 responsible for phosphorylating ion channels to close stomata<sup>41,42</sup>.

279 Like *aba2*, the *snrk2.2snrk2.3* mutant demonstrated a reduced root elongation rate under  
280 humidity stress (Fig 4d). Complementation of the *snrk2.2snrk2.3* mutant specifically in the root  
281 tip with *RCH1pro::SnRK2.2*<sup>43</sup> allowed plants to maintain root growth under a humidity stress,  
282 indicating that local ABA signalling is required to regulate root growth as humidity varies (Fig  
283 4d).

284 ABA synthesized in the phloem companion cells<sup>29</sup>, is likely to be transported to phloem sinks  
285 including the root elongation zone<sup>30</sup>. We posited that the root induction of ABA accumulation at  
286 low foliar humidity might be phloem sourced so performed targeted ABA depletions by  
287 controlled induction of *CYP707A3* overexpression (Fig 4e). Whether ectopic ABA depletion was  
288 restricted to phloem-loading companion cells (*SUC2pro::XVE::CYP707A3*) or ubiquitous  
289 (*UBQ10pro::XVE::CYP707A3*), root growth was inhibited at low foliar humidity (Fig 4e).

290 Taken together, our results indicate that phloem ABA and root tip ABA signalling regulate root  
291 growth during a distal humidity stress in leaves.

292

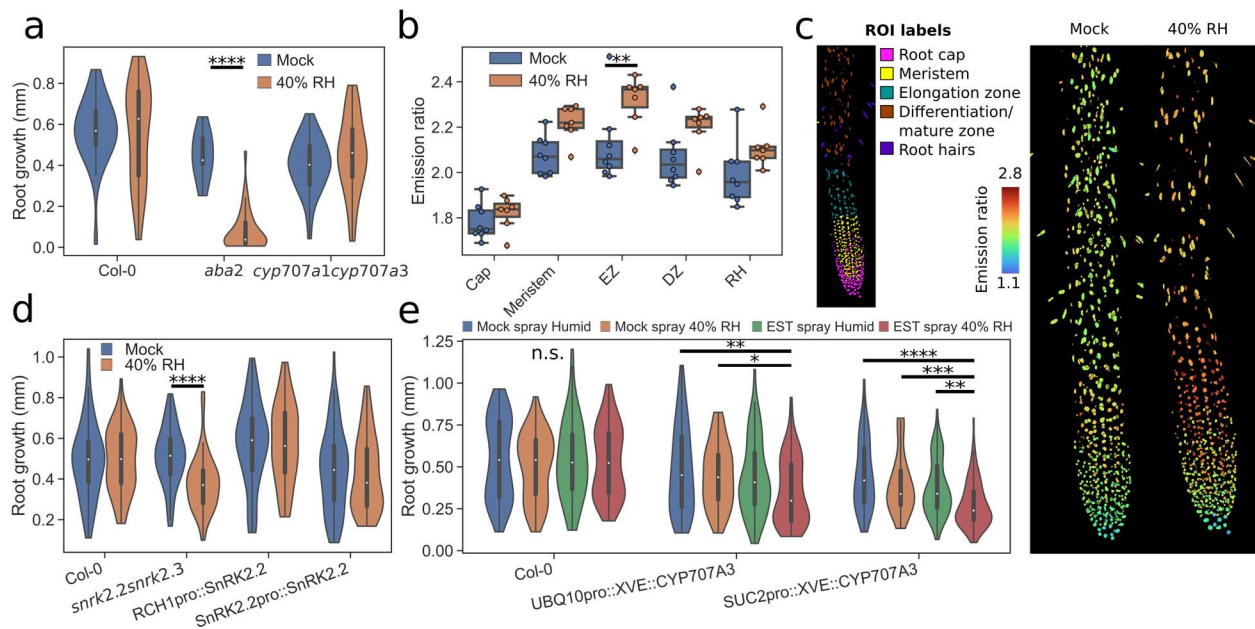

293  
294  
295 **Fig 4. Foliar humidity decreases induce root ABA accumulation to regulate root growth.** a) Root growth of 6  
296 DAS Col-0, *aba2* and *cyp707a1cyp707a3* in response to 7 hour foliar humidity drop. 2-way ANOVA (Treatment  
297  $F=15.0$ ,  $p=0.002$   $DF=1$ ; Genotype  $F=31.8$ ,  $p<0.0001$   $DF=2$ ; interaction  $F=16.7$   $p<0.0001$   $DF=2$ ).  
298  $n=31,27,36,9,35,40$  respectively. A Tukey post hoc test was used for multiple comparisons. b) and c) Root emission  
299 ratios of nlsABACUS2-100n increase under humidity stress, with the elongation zone showing a significant ABA  
300 accumulation and little response in the root cap. EZ: Elongation zone, DZ: Differentiation/maturation zone, RH:  
301 Root hair. Each point indicates median nuclear emission ratio for an individual root z-stack. 2-way ANOVA  
302 (Treatment  $F=23.64$   $DF=1$   $p<0.0001$ ; Root zone  $F=31.29$   $DF=4$ ,  $p<0.0001$ ; interaction  $F=0.978$   $DF=4$   
303  $p=0.426$ ).  $n=8,7,8,7,8,7,8,7,8,7$  respectively. A Tukey post hoc test was used for multiple comparisons. d) Root  
304 growth of 6 DAS Col-0, *snrk2.2snrk2.3*, *snrk2.2snrk2.3* RCH1pro::SnRK2.2, and *snrk2.2snrk2.3*  
305 SnRK2pro::SnRK2.2 in response to a short term foliar humidity drop. 2-way ANOVA (Treatment  $F=5.158$   
306  $p=0.0235$   $DF=1$ ; Genotype  $F=16.68$ ,  $p<0.0001$   $DF=3$ ; interaction  $F=4.303$   $p=0.00052$   $DF=3$ ).  $n=$   
307  $58,64,80,60,69,64,77,52$  respectively. A Tukey post hoc test was used for multiple comparisons. e) Root growth of 6  
308 DAS Col-0, UBQ10pro::XVE::CYP707A3 and SUC2pro::XVE::CYP707A3 in response to a short term foliar  
309 humidity drop 24 hours after a shoot spray of 50  $\mu$ M  $\beta$ -Estradiol. 2-way ANOVA (Treatment  $F=10.91$   $p<0.0001$   
310  $DF=3$ ; Genotype  $F=51.57$ ,  $p<0.0001$   $DF=2$ ; interaction  $F=3.063$   $p=0.0057$   $DF=6$ ).  
311  $n=81,90,70,70,58,70,67,68,116,67,85,111$  respectively A Tukey post hoc test was used for multiple comparisons.  
312 Asterisks indicate statistical significance \*:  $p<0.05$ , \*\*:  $p<0.01$ , \*\*\*:  $p<0.001$ , \*\*\*\*:  $p<0.0001$

313

314 A series of local and systemic responses are required for plants to respond to varying water  
315 availability. Phenotypic data suggests that plant roots can respond to local osmotic differences  
316 through ABA, for example growing towards water (hydrotropism)<sup>43</sup>, but determining if ABA  
317 levels vary across a root has been experimentally challenging. nlsABACUS2 allows local  
318 increases in ABA to be visualized at the cellular level, as in the accompanying submission.  
319 Mehra *et al.* show a local increase in root ABA in response to root growth through air spaces,  
320 without an increase in foliar ABA levels<sup>44</sup>. Similarly, we have shown that salt stress induces  
321 ABA accumulation in the tissues where a protective response is required, the root endodermis.  
322 However, plant roots can also induce systemic ABA accumulation. During soil drying, both

323 sulfate and CLE25 peptides can be transported from the root to induce foliar ABA accumulation,  
324 closing stomata and limiting water loss<sup>1-3</sup>. During drought, some of this shoot derived ABA is  
325 also transported down to the root to promote and maintain root growth, allowing more access to  
326 soil water<sup>8</sup>. That foliar tissues can sense water loss has long been known, as plants quickly  
327 regulate their stomatal aperture in response to an increased vapor pressure deficit, a process  
328 enhanced by foliar ABA accumulation<sup>45</sup>. Here we show, with cellular resolution afforded by  
329 nlsABACUS2 biosensors, that foliar drying can also regulate root ABA accumulation and that  
330 this root ABA is important to maintain root growth under stress. This demonstrates that the root  
331 and shoot can each systemically regulate each other's responses to stresses that may only be  
332 experienced locally, providing a robust system to maintain plant water status.

### 333 **References**

- 334 1. Takahashi, F. *et al.* A small peptide modulates stomatal control via abscisic acid in long-  
335 distance signalling. *Nat.* 2018 5567700 **556**, 235–238 (2018).
- 336 2. Malcheska, F. *et al.* Drought-enhanced xylem sap sulfate closes stomata by affecting  
337 ALMT12 and guard cell ABA synthesis. *Plant Physiol.* **174**, 798–814 (2017).
- 338 3. Batool, S. *et al.* Sulfate is Incorporated into Cysteine to Trigger ABA Production and  
339 Stomatal Closure. *Plant Cell* **30**, 2973–2987 (2019).
- 340 4. Hepworth, C., Turner, C., Landim, M. G., Cameron, D. & Gray, J. E. Balancing Water  
341 Uptake and Loss through the Coordinated Regulation of Stomatal and Root Development.  
342 *PLoS One* **11**, e0156930 (2016).
- 343 5. An, P., Inanaga, S., Xiang, J. L., Eneji, A. E. & Nan, W. Z. Interactive Effects of Salinity  
344 and Air Humidity on Two Tomato Cultivars Differing in Salt Tolerance.  
345 <http://dx.doi.org/10.1081/PLN-200049177> **28**, 459–473 (2007).
- 346 6. Lambers, H. & Posthumus, F. The Effect of Light Intensity and Relative Humidity on  
347 Growth Rate and Root Respiration of *Plantago lanceolata* and *Zea mays*. *J. Exp. Bot.* **31**,  
348 1621–1630 (1980).
- 349 7. Hunter, J. H., Hsiao, A. I. & McIntyre, G. I. Some Effects of Humidity on the Growth and  
350 Development of *Cirsium arvense*. <https://doi.org/10.1086/337552> **146**, 483–488 (2015).
- 351 8. McAdam, S. A. M., Brodribb, T. J. & Ross, J. J. Shoot-derived abscisic acid promotes



- 352 root growth. *Plant. Cell Environ.* **39**, 652–659 (2016).
- 353 9. Kuromori, T., Seo, M. & Shinozaki, K. ABA Transport and Plant Water Stress Responses.  
354 *Trends Plant Sci.* **23**, 513–522 (2018).
- 355 10. Jones, A. M. A new look at stress: abscisic acid patterns and dynamics at high-resolution.  
356 *New Phytol.* **210**, 38–44 (2016).
- 357 11. Rowe, J. H. & Jones, A. M. Focus on biosensors: Looking through the lens of quantitative  
358 biology. *Quant. Plant Biol.* **2**, (2021).
- 359 12. Rizza, A., Walia, A., Lanquar, V., Frommer, W. B. & Jones, A. M. In vivo gibberellin  
360 gradients visualized in rapidly elongating tissues. *Nat. Plants* **3**, 803–813 (2017).
- 361 13. Waadt, R. *et al.* FRET-based reporters for the direct visualization of abscisic acid  
362 concentration changes and distribution in Arabidopsis. *Elife* **3**, e01739 (2014).
- 363 14. Jones, A. M. *et al.* Abscisic acid dynamics in roots detected with genetically encoded  
364 FRET sensors. *Elife* **3**, e01741 (2014).
- 365 15. Rizza, A. *et al.* Differential biosynthesis and cellular permeability explain longitudinal  
366 gibberellin gradients in growing roots. *Proc. Natl. Acad. Sci.* **118**, e1921960118 (2021).
- 367 16. Li, Z., Waadt, R. & Schroeder, J. I. Release of GTP Exchange Factor Mediated Down-  
368 Regulation of Abscisic Acid Signal Transduction through ABA-Induced Rapid  
369 Degradation of RopGEFs. *PLoS Biol.* **14**, 1–27 (2016).
- 370 17. Inomata, M., Hirai, N., Yoshida, R. & Ohigashi, H. The biosynthetic pathway to abscisic  
371 acid via ionylideneethane in the fungus *Botrytis cinerea*. *Phytochemistry* **65**, 2667–2678  
372 (2004).
- 373 18. Bruzzone, S. *et al.* Abscisic acid is an endogenous cytokine in human granulocytes with  
374 cyclic ADP-ribose as second messenger. *Proc. Natl. Acad. Sci. U. S. A.* **104**, 5759–5764  
375 (2007).
- 376 19. Riggs, J. W., Rockwell, N. C., Cavales, P. C. & Callis, J. Identification of the Plant  
377 Ribokinase and Discovery of a Role for Arabidopsis Ribokinase in Nucleoside  
378 Metabolism. *J. Biol. Chem.* **291**, 22572–22582 (2016).
- 379 20. Waadt, R., Krebs, M., Kudla, J. & Schumacher, K. Multiparameter imaging of calcium

- 380 and abscisic acid and high-resolution quantitative calcium measurements using R-  
381 GECO1-mTurquoise in Arabidopsis. *New Phytol.* **216**, 303–320 (2017).
- 382 21. Waadt, R. *et al.* Dual-reporting transcriptionally linked genetically encoded fluorescent  
383 indicators resolve the spatiotemporal coordination of cytosolic abscisic acid and second  
384 messenger dynamics in arabidopsis. *Plant Cell* **32**, 2582–2601 (2020).
- 385 22. Elzinga, D. *et al.* Defining and Exploiting Hypersensitivity Hotspots to Facilitate Abscisic  
386 Acid Agonist Optimization. *ACS Chem. Biol.* **14**, 332–336 (2019).
- 387 23. Van Rosmalen, M., Krom, M. & Merkx, M. Tuning the Flexibility of Glycine-Serine  
388 Linkers to Allow Rational Design of Multidomain Proteins. *Biochemistry* **56**, 6565–6574  
389 (2017).
- 390 24. Miyazono, K. I. *et al.* Structural basis of abscisic acid signalling. *Nature* **462**, 609 (2009).
- 391 25. Melcher, K. *et al.* A gate-latch-lock mechanism for hormone signalling by abscisic acid  
392 receptors. *Nature* **462**, 602–608 (2009).
- 393 26. Rowe, J. H., Rizza, A. & Jones, A. M. Quantifying Phytohormones in Vivo with FRET  
394 Biosensors and the FRETENATOR Analysis Toolset. in *Environmental Responses in*  
395 *Plants* 239–253 (Humana, New York, NY, 2022). doi:10.1007/978-1-0716-2297-1\_17
- 396 27. Grossmann, G. *et al.* The Rootchip: An integrated microfluidic chip for plant Science.  
397 *Plant Cell* **23**, 4234–4240 (2011).
- 398 28. Saito, S. *et al.* Arabidopsis CYP707As encode (+)-abscisic acid 8'-hydroxylase, a key  
399 enzyme in the oxidative catabolism of abscisic acid. *Plant Physiol.* **134**, 1439–1449  
400 (2004).
- 401 29. Kuromori, T., Sugimoto, E. & Shinozaki, K. Focus on Water: Intertissue Signal Transfer  
402 of Abscisic Acid from Vascular Cells to Guard Cells. *Plant Physiol.* **164**, 1587 (2014).
- 403 30. Ross-Elliott, T. J. *et al.* Phloem unloading in arabidopsis roots is convective and regulated  
404 by the phloempole pericycle. *Elife* **6**, (2017).
- 405 31. Ghassemian, M. *et al.* Regulation of Abscisic Acid Signaling by the Ethylene Response  
406 Pathway in Arabidopsis. *Plant Cell* **12**, 1117–1126 (2000).
- 407 32. Kushiro, T. *et al.* The Arabidopsis cytochrome P450 CYP707A encodes ABA 8'-

- 408 hydroxylases: key enzymes in ABA catabolism. *EMBO J.* **23**, 1647–1656 (2004).
- 409 33. Okamoto, M. *et al.* High Humidity Induces Abscisic Acid 8'-Hydroxylase in Stomata and  
410 Vasculature to Regulate Local and Systemic Abscisic Acid Responses in Arabidopsis.  
411 *Plant Physiol.* **149**, 825–834 (2009).
- 412 34. Okamoto, M. *et al.* CYP707A1 and CYP707A2, which encode abscisic acid 8'-  
413 hydroxylases, are indispensable for proper control of seed dormancy and germination in  
414 Arabidopsis. *Plant Physiol.* **141**, 97–107 (2006).
- 415 35. Barberon, M. *et al.* Adaptation of Root Function by Nutrient-Induced Plasticity of  
416 Endodermal Differentiation. *Cell* **164**, 447–459 (2016).
- 417 36. Shukla, V. *et al.* Suberin plasticity to developmental and exogenous cues is regulated by a  
418 set of MYB transcription factors. *Proc. Natl. Acad. Sci. U. S. A.* **118**, (2021).
- 419 37. Bauer, H. *et al.* The Stomatal Response to Reduced Relative Humidity Requires Guard  
420 Cell-Autonomous ABA Synthesis. *Curr. Biol.* **23**, 53–57 (2013).
- 421 38. Ikegami, K., Okamoto, M., Seo, M. & Koshiba, T. Activation of abscisic acid biosynthesis  
422 in the leaves of Arabidopsis thaliana in response to water deficit. *J. Plant Res.* **122**, 235–  
423 243 (2009).
- 424 39. Duan, L. *et al.* Endodermal ABA signaling promotes lateral root quiescence during salt  
425 stress in Arabidopsis seedlings. *Plant Cell* **25**, 324–341 (2013).
- 426 40. Rowe, J. H., Topping, J. F., Liu, J. & Lindsey, K. Abscisic acid regulates root growth  
427 under osmotic stress conditions via an interacting hormonal network with cytokinin,  
428 ethylene and auxin. *New Phytol.* **211**, 225–239 (2016).
- 429 41. Fujii, H., Verslues, P. E. & Zhu, J. K. Identification of two protein kinases required for  
430 abscisic acid regulation of seed germination, root growth, and gene expression in  
431 Arabidopsis. *Plant Cell* **19**, 485–494 (2007).
- 432 42. Lee, S. C., Lan, W., Buchanan, B. B. & Luan, S. A protein kinase-phosphatase pair  
433 interacts with an ion channel to regulate ABA signaling in plant guard cells. *Proc. Natl.*  
434 *Acad. Sci. U. S. A.* **106**, 21419–21424 (2009).
- 435 43. Dietrich, D. *et al.* Root hydrotropism is controlled via a cortex-specific growth  
436 mechanism. *Nat. Plants* 2017 36 **3**, 1–8 (2017).

- 437 44. Mehra, P. *et al.* Hydraulic flux responsive hormone redistribution determines root  
438 branching.
- 439 45. Merilo, E. *et al.* Stomatal VPD Response: There Is More to the Story Than ABA. *Plant*  
440 *Physiol.* **176**, 851 (2018).
- 441 46. Mirdita, M. *et al.* ColabFold: making protein folding accessible to all. *Nat. Methods* 2022  
442 1–4 (2022). doi:10.1038/s41592-022-01488-1
- 443 47. Jones, A. M. *et al.* Border control - A membrane-linked interactome of Arabidopsis.  
444 *Science (80-. )*. **344**, 711–716 (2014).
- 445 48. Siligato, R. *et al.* MultiSite Gateway-Compatible Cell Type-Specific Gene-Inducible  
446 System for Plants. *Plant Physiol.* **170**, 627–641 (2016).
- 447 49. Karimi, M., De Meyer, B. & Hilson, P. Modular cloning in plant cells. *Trends Plant Sci.*  
448 **10**, 103–105 (2005).
- 449 50. Roszak, P. *et al.* Cell-by-cell dissection of phloem development links a maturation  
450 gradient to cell specialization. *Science (80-. )*. **374**, (2021).
- 451 51. Clough, S. J. & Bent, A. F. Floral dip: A simplified method for Agrobacterium-mediated  
452 transformation of Arabidopsis thaliana. *Plant J.* **16**, 735–743 (1998).
- 453 52. Shimada, T. L., Shimada, T. & Hara-Nishimura, I. A rapid and non-destructive screenable  
454 marker, FAST, for identifying transformed seeds of Arabidopsis thaliana. *Plant J.* **61**,  
455 519–528 (2010).
- 456 53. Murashige, T. & Skoog, F. A Revised Medium for Rapid Growth and Bio Assays with  
457 Tobacco Tissue Cultures. *Physiol. Plant.* **15**, 473–497 (1962).
- 458 54. Lawson, T., James, W., Weyers<sup>1</sup>, J. & Weyers, J. A surrogate measure of stomatal  
459 aperture. *J. Exp. Bot.* **49**, 1397–1403 (1998).
- 460 55. Pitrone, P. G. *et al.* OpenSPIM: an open-access light-sheet microscopy platform. *Nat.*  
461 *Methods* 2013 107 **10**, 598–599 (2013).
- 462 56. Candeo, A., Doccula, F. G., Valentini, G., Bassi, A. & Costa, A. Light Sheet Fluorescence  
463 Microscopy Quantifies Calcium Oscillations in Root Hairs of Arabidopsis thaliana. *Plant*  
464 *Cell Physiol.* **58**, 1161–1172 (2017).

- 465 57. Schindelin, J. *et al.* Fiji: an open-source platform for biological-image analysis. *Nat.*  
466 *Methods* **9**, 676 (2012).
- 467 58. Preibisch, S., Saalfeld, S., Schindelin, J. & Tomancak, P. Software for bead-based  
468 registration of selective plane illumination microscopy data. *Nat. Methods* **2010 76 7**,  
469 418–419 (2010).
- 470 59. Schneider, C. A., Rasband, W. S. & Eliceiri, K. W. NIH Image to ImageJ: 25 years of  
471 image analysis. *Nat. Methods* **9**, 671–675 (2012).
- 472 60. Rueden, C. T. *et al.* ImageJ2: ImageJ for the next generation of scientific image data.  
473 *BMC Bioinformatics* **18**, 529 (2017).
- 474 61. Haase, R. *et al.* CLIJ: GPU-accelerated image processing for everyone. *Nature Methods*  
475 **17**, 5–6 (2020).
- 476 62. Rizza, A., Walia, A., Tang, B. & Jones, A. M. Visualizing cellular gibberellin levels using  
477 the nlsGPS1 förster resonance energy transfer (FRET) biosensor. *J. Vis. Exp.* **2019**, 58739  
478 (2019).
- 479 63. Parslow, A., Cardona, A. & Bryson-Richardson, R. J. Sample drift correction following  
480 4D confocal time-lapse imaging. *J. Vis. Exp.* (2014). doi:10.3791/51086
- 481 64. Léon-Kloosterziel, K. M. *et al.* Isolation and characterization of abscisic acid-deficient  
482 *Arabidopsis* mutants at two new loci. *Plant J.* **10**, 655–661 (1996).

## 483 **Methods**

### 484 Data visualization and statistical analysis

485 Unless otherwise stated, data was processed as Pandas dataframes in Python, using stats-  
486 model/Graphpad prism for statistics and Seaborn/matplotlib/excel for plotting.

### 487 Generation of ABACUS affinity and orthogonality variants

488 Single amino acid mutations of the PYL1 domain of ABACUS1 in the pDRFLIP38-ABACUS1-  
489 2 $\mu$  vector<sup>14</sup> using the QuikChange II XL [Agilent] site-directed mutagenesis kit according to man-  
490 ufacturer's instructions. All primers used for site-directed mutagenesis are listed in **Extended Data**  
491 **Table 2.**



## 492 Generation of ABACUS ratio-change variants

493 The edCitrine present in ABACUS1 variants<sup>14</sup> was exchanged with a codon diversified version  
494 for optimal expression in yeast and to allow PCR based cloning methods. The synthetic DNA  
495 fragment containing the codon diversified edCitrine was introduced in the ABACUS yeast expres-  
496 sion vectors using the In-Fusion kit [Takara Bio] according to manufacturer's instructions.

497 The poly-proline screen variants, which included substitution of the attB1 and attB2 linkers of  
498 ABACUS1 with 1-3 proline residues, and the fluorescent proteins truncations were obtained using  
499 the In-Fusion kit according to manufacturer's instructions. All primers used for In-Fusion cloning  
500 are listed in **Extended Data Table 2**.

## 501 Fluorescence analysis and titration with (+)-ABA of protein purified cell lysate

502 Yeast cell cultures (OD<sub>600</sub> ≈ 0.6) containing yeast expression vector pDRFLIP38-ABACUS1-2μ  
503 or variants were centrifuged at 4000g for 10min, washed once in 1 mL of 50 mM MOPS Buffer  
504 (pH7.4), transferred to 1.5 mL micro-centrifuge tubes and centrifuged again at 10000g for 1min.  
505 The supernatant was discarded and 1 mL of chilled glass bead slurry (50 mM MOPS pH7.4,  
506 0.1% Triton X-100 and 50% vol/vol 0.5 mm Zirconia/Silica beads [Thistle Scientific]) was  
507 added to the yeast pellet inside each tube. The tubes were then vortexed at maximum power at  
508 4°C for 5min. The tubes were then centrifuged at 14000x at 4°C for 10 min. The supernatant was  
509 transferred to previously prepared HisPur Cobalt Spin Columns, 0.2 mL [Thermo Fisher Scien-  
510 tific]. Protein purification was performed following manufacturer's instructions. The subsequent  
511 first elution from the purification column was diluted in 50mM MOPS solution. The tubes were  
512 briefly vortexed and 100μl of diluted eluate was transferred to 96-well flat bottom clear micro-  
513 plate [Greiner]. A serial dilution of (+)-ABA [Cayman Chemical] was made using a 4.5mM  
514 stock solution in ethanol and sequentially diluting it in 50mM MOPS solution. 50μL of each (+)-  
515 ABA dilution was added to 100μL of sensor eluate. The sample's fluorescence emission was rec-  
516 orded using a SpectraMax i3x [Molecular Devices], scanning from 470 to 550nm after excitation  
517 at 430nm with a bandwidth of 5nm. The data produced was analysed using GraphPad Prism  
518 [GraphPad Software] to determine the  $K_D$  and ratio change of each sensor, assuming the Hill  
519 function with a single binding site.

520

## 521 Structure prediction

522

523 nlsABACUS2-100n structures were predicted (for illustrative purposes only) using the Colab-  
524 Fold 1.4 notebook, based on Alphafold2, using MMseqs2 for homology detection and multiple  
525 sequence alignment pairing<sup>46</sup>. The highest ranked (by pLDDT) prediction was used. Structural  
526 validation and confidence measures are shown in Extended Data Fig. 3.

527

#### 528 Cloning ABA biosynthetic and catabolic enzyme constructs for inducible expression in plants

529 *AtNCED3* (AT3G14440.1) was amplified with attB1/attB2 sites with q5 polymerase, following  
530 manufacturer's instructions, and inserted into pDONR221-f1<sup>47</sup> with a BP reaction. *AtCYP707A3*  
531 (AT5G45340.1) coding sequence with attL1/attR1 sites was synthesized in pUC19 from Ge-  
532 newiz. These could then be combined with *p1R4-pAtSUC2:XVE/p1R4-pUBQ10:XVE* and  
533 *p2R3a-NosT*<sup>48</sup> through a Multisite LR reaction to generate *SUC2pro::XVE>>CYP707A3*,  
534 *UBQ10pro::XVE>>CYP707A3*, and *UBQ10pro::XVE>>NCED3* in *pHm43GW*<sup>49</sup>. Gateway  
535 cloning was performed following manufacturer's instructions.

536

#### 537 Cloning ABACUS2 constructs for expression in plants

538

539 *ABACUS2-100n* and *ABACUS2-400n* were subcloned from the yeast vectors, reverting the codon  
540 diversification of the edCitrineT9. To do this, the sensory domain to the stop codon were ampli-  
541 fied with attB1/attB2 sites and inserted into *pDONR221-f1* with a BP reaction. *nls-edCitrineT9*  
542 was amplified from *nlsABACUS1-2μ* plasmid<sup>14</sup> and introduced into the *pENTR221-f1-ABA-*  
543 *CUS2-truncation* vectors using In-Fusion cloning (Takara) to generate *pENTR-nlsABACUS2-*  
544 *100n* and *pENTR-nlsABACUS2-400n*. ABACUS2 Gateway entry clones were combined with  
545 *p1R4-pUBQ10* and *p2R3a-NosT* into *pFR7m34GW*<sup>50</sup> through a multisite LR reaction. Primers  
546 are listed in **Extended Data Table 2**.

547

548 Plant transformation

549 *Arabidopsis thaliana* plants (Columbia, Col-0 background) were transformed by the floral dip  
550 method<sup>51</sup> and successful transformants were identified by FAST RED screening<sup>52</sup>, or hygromy-  
551 cin selection. Full details of *Arabidopsis* germplasm are available in Extended Data Table 3

552

553 Plant growth conditions

554 For endpoint root imaging experiments, plants were grown under long day conditions (110  $\mu$ E,  
555 22 °C 18hrs, 0  $\mu$ E, 18°C 6hrs).

556

557 Salt treatment

558 Seeds were surface sterilized with 96% ethanol, then sown on ½ Murashige and Skoog (MS)<sup>53</sup>  
559 0.05% MES plates pH 5.7, sealed with micropore tape, then stratified for 4 days at 4°C. Plants  
560 were grown for 5 DAG before a 5.5 hour treatment. Treatment consisted of a transfer to ½ MS  
561 plates containing 100mM (45511 Merck) or a fresh ½ MS MES plate for mock.

562

563 Fluridone treatment

564 Seeds were surface sterilized with 96% ethanol, then sown on ½ MS plates 0.05% MES pH 5.7,  
565 sealed with micropore tape, then stratified for 4 days at 4°C. Plants were grown for 5 DAG be-  
566 fore a 24 hour treatment. For treatment, plants were transferred to ½ MS plates containing 0.4  
567  $\mu$ M fluridone (45511 Merck), or an Ethanol mock.

568

569  $\beta$ - Estradiol induction of ABA biosynthesis/catabolism

570

571 Seeds were surface sterilized with 96% ethanol, then sown on ½ MS 0.05% MES plates pH 5.7,  
572 sealed with micropore tape, then stratified for 4 days at 4°C. Plants were grown for 5 DAG be-  
573 fore a 24 hour treatment. Treatment consisted of a transfer to ½ MS 0.05% MES plates pH 5.7  
574 containing 10 $\mu$ M  $\beta$ - Estradiol or a DMSO mock.

575

576 Leaf humidity treatments for leaf imaging

577 nlsABACUS-400n seeds were surface sterilized with 96% ethanol, then stratified for 4 days at  
578 4°C in sterile deionized water, before sowing on F2 Levington's compost. Plants were grown  
579 (120  $\mu$ E, 22 °C 18hrs, 0  $\mu$ E, 18°C 6hrs) for 15 DAG before humidity treatment. Plants were ger-  
580 minated under a clear plastic propagator lid, which was removed at 4 DAG.

581  
582 For a humidity increase, the chamber was set to 60% RH, and humidity increased by placing a  
583 propagator lid over the plants for 6 hours before imaging. Humidity and temperature were meas-  
584 ured at leaf height above compost at ~95% RH 22 °C for treatment, and ~82% RH 22 °C for  
585 mock. Humidity and temperature were measured using a BME280 sensor.

586  
587 For a humidity decrease, the chamber was set to 40% RH, and were grown with a propagator lid  
588 until treatment. For treatment, compost was covered with acetate to slow evaporation and the lid  
589 was removed for 6 hours before imaging. Humidity and temperature were measured at leaf  
590 height at ~76% RH 22 °C for treatment and ~95% RH 22 °C for mock. Humidity and tempera-  
591 ture were measured using a BME280 sensor.

592

593 Peristomatal distance measurement

594  
595 Stomatal aperture is challenging to measure from confocal images, but correlates strongly with  
596 peristomatal distance<sup>54</sup>, which we measured in our nlsABACUS-400n humidity treatment con-  
597 focal stacks. The line tool in Fiji was used to measure distance using a transmitted-light channel.

598

599 Foliar humidity treatment for root imaging

600 8 ml of ½ MS 0.8% pH 5.7 Agar was poured into a Nunc™ Lab-Tek™ II Chambered Cover-  
601 glass (155360 Thermo Fisher) and allowed to set. Half of the agar was aseptically removed and  
602 seeds were placed on the agar, next to the coverslip to allow plant roots to grow vertically be-  
603 tween the agar and coverslip ( Extended Data Fig. 17). Chambers were sealed three times with  
604 micropore tape, stratified for four days and then plants were grown to 6 days post stratification in  
605 a long day chamber. For the humidity treatment, imaging chambers were opened, a piece of

606 folded acetate was placed over the agar to prevent direct evaporation, and aerial tissues were ex-  
607 posed to the 40% RH 22°C chamber for six hours (Extended Data Fig. 17). Mock treatment in-  
608 volved opening the chamber, applying a smaller piece of acetate and resealing before returning  
609 to the growth chamber. The smaller acetate application acts as a control for any mechanical per-  
610 turbation, but still retains a large area for water exchange between the agar and air, so the cham-  
611 ber remains humid and equilibrates quickly.  
612

#### 613 Foliar humidity treatment for root growth assays and $\beta$ -Estradiol pretreatment.

614 80ml of  $\frac{1}{2}$  MS 0.8% pH 5.7 agar was poured into a 10cm square plate, and allowed to set. 2.5cm  
615 of agar was aseptically removed from one side and seeds were placed on the agar, next to the  
616 back of the plate to allow plant roots to grow vertically between the agar and plate (Extended  
617 Data Fig. 13). Plates were sealed three times with micropore tape, stratified for four days, and  
618 then plants were grown for 6 days post stratification in a long day chamber. Immediately before  
619 treatment, the position of the primary root was marked on the plate with a razor blade and a dis-  
620 secting microscope.

621 For the humidity treatment, plates were opened, a piece of folded acetate was placed over the  
622 agar to prevent direct evaporation, and plants were exposed to the 40% RH 22°C chamber for 7  
623 hours (Extended Data Fig. 13). Mock treatment involved opening the plates, applying a smaller  
624 piece of acetate and resealing before returning to the growth chamber. The smaller acetate appli-  
625 cation acts as a control for any mechanical perturbation, but still retains a large area for water ex-  
626 change between the agar and air, so the plate remains humid and equilibrates quickly.  
627

628 For UBQ10<sup>pro</sup>/SUC2<sup>pro</sup>:XVE>>CYP707A3 induction pretreatment experiments, 24 hours be-  
629 fore humidity treatment plates were opened, sprayed with 50  $\mu$ M  $\beta$ -Estradiol 0.25% DMSO 0.05  
630 % Silwett-77 or mock solution (0.25% DMSO and 0.05 % Silwett-77). Excess solution was re-  
631 moved with a paper towel, plates were resealed and replaced in the growth chamber.

632

633

#### 634 Rootchip microfluidics treatments

635



636 The RootChip-8S device was used for ABA pulsing as previously<sup>12,27</sup>. Arabidopsis seeds were  
637 germinated on the bottom 5 mm of 10  $\mu$ l pipette tips filled with solidified growth medium ( $\frac{1}{2}$   
638 MS, 1% Agar, 0.05% (wt/vol) MES pH 5.7). After 4 to 7 d, pipette tip seedlings were transferred  
639 to the polydimethylsiloxane RootChip-8S device under aseptic conditions. A peristaltic pump  
640 was used (DNE GmbH; volumetric flow rate in each channel, 5 mL/min) to perfuse the roots  
641 with  $\frac{1}{4}$  MS pH 5.7 liquid media. The dead volume was assessed, and it took approximately 12  
642 minutes for media to pass through the tubing to reach the root, which was taken into account  
643 when plotting the ABA treatments. Imaging was performed on an inverted Leica SP8 with a 20 $\times$   
644 dry 0.70 HC PLAN APO objective. 448 nm and 514 nm lasers were used for excitation of edCe-  
645 rulean and edCitrine, respectively. Emission settings were 460 to 490 nm for Cerulean and 520  
646 to 550 nm for edCitrine.

647

#### 648 ABA hypersensitivity germination assays

649 Seeds were surface sterilized, placed on large  $\frac{1}{2}$  MS + MES agar plates with or without 1  $\mu$ M  
650 ABA and stratified for 4 days. After transfer to a growth chamber, a dissecting microscope was  
651 used to score germination daily. Seedling emergence from the endosperm was used to score ger-  
652 mination.

653

654

#### 655 ABA hypersensitivity root growth assays

656 Seeds were surface sterilized, placed on large  $\frac{1}{2}$  MS + MES agar plates vertically in a growth  
657 chamber. At 7 DAG, seedlings of approximately equal length were transferred to mock or 10  $\mu$ M  
658 ABA plates. Root tip positions were marked and plates were replaced vertically in the growth  
659 cabinet for 40 hours before imaging on a flatbed scanner. Root growth was measured with the  
660 segmented line tool of Fiji.

661

662

663 Confocal imaging

664 An upright SP8-Fliman was used for most biosensor imaging. An inverted SP8-iphox was used  
665 for RootChip imaging. All images were acquired as Z-stacks in 16 bit mode, with a 10× dry or  
666 20× dry 0.70 HC PLAN APO dry objective. Samples were mounted in ¼ MS pH 5.7.

667

668 Typical settings were as follows: Sequential scanning was used with the following laser/detector  
669 settings: Sequence 1: 442 excitation 5-30%, HYD1: 460-500nm, 100 Gain; HYD2 525-560nm,  
670 100 Gain. Sequence 2: 514 excitation 5-30%, HYD2 525-560nm, 100 Gain. Scan speed 400,  
671 Line averaging: 2-4, Bidirectional X:on

672

673 Lightsheet microscope setup

674

675 Lightsheet microscopy was performed using a custom-built laser scanning light sheet micro-  
676 scope. The design is based on an openspim geometry<sup>55</sup> with dual side illumination and dual side  
677 detection. Water immersion objectives are mounted horizontally (Nikon 10x, 0.3 NA for excita-  
678 tion, Olympus 20x 1.0 NA for detection) with the sample suspended from the top in an agarose  
679 filled Fluorinated Ethylene Propylene tube (FEP). For sample placement as well as for imaging  
680 the sample can be moved between the objectives well as rotated with piezo-driven stages (Nanos  
681 LPS-30, Nanos RPS-LW20). Image stacks are acquired by moving the sample through the sta-  
682 tionary imaging plane. 445nm and 488 nm lasers (Omicron LuxX 445-100, Omicron LuxX 488-  
683 200) were used for excitation and combined in an Omicron LightHub 6 with dual fibre output.  
684 The fibre output was collimated, galvo scanned (Galvo system: Thorlabs GVSM002-EC/M) and  
685 magnified resulting in a scanned light sheet with typical FWHM < 5µm. Two sCMOS cameras  
686 (Hamamatsu Orca Flash 4) with 6.5x6.5 µm<sup>2</sup> pixel size are used for detection. Two motorised  
687 filter wheels (Cairn OptoSpin) with bandpass filters (Semrock FF01-480/17, Semrock FF01-  
688 532/18) allow the recording of specific fluorescence bands. The microscope is controlled by a  
689 custom software developed in LabVIEW (National Instruments). Data was streamed to disk and  
690 converted to TIFF files directly after acquisition resulting in image voxel sizes of 1 µm<sup>3</sup>.

691

692

693 Lightsheet imaging

694

695 The plants were grown suspended in a cut 10  $\mu$ L pipette tip as in <sup>56</sup> in  $\frac{1}{2}$  MS pH5.7, 0.5% aga-  
696 rose FEP tubes (ID 0.8 mm)). They were illuminated from 2 sides while 3 fluorescent channels  
697 are recorded sequentially (Ch1: Exc 445nm, Em 480/17, Ch2: Exc 488nm, Em 532/18, Ch3: Exc  
698 445nm, Em 532/18). Typical excitation powers set in software were 10%-50% for 445 nm exci-  
699 tation and 1-3% for 488nm excitation. Camera exposure time was set to 100ms per plane for all  
700 channels. Multiple viewpoints (60° rotation increment) were recorded for each timepoint and  
701 combined in Fiji <sup>57</sup> using the Multiview reconstruction plugin <sup>58</sup> before further analysis.  
702 Foliar ABA treatment was performed by pipetting 5  $\mu$ M ABA into the top of the cut pipette tip  
703 onto the cotyledons, which is isolated from the roots.

704

705 FRETENATOR toolset development

706 A fast yet flexible analysis pipeline was required to analyse biosensor data. Because the biosen-  
707 sors used in this paper are nuclear localized, the pipeline was designed for punctate nuclear seg-  
708 mentation and analysis is performed on a per nucleus basis. The toolset consists of two plugins.  
709 ***FRETENATOR Segment and ratio*** is used to segment punctate structures, perform ratio calcu-  
710 lations and export the data as images and a results table. ***FRETENATOR ROI Labeller*** is used  
711 to assign specific labels to the regions of interest (ROI) produced by ***FRETENATOR Segment***  
712 ***and ratio*** and exports this information to the results table.

713

714 Development: *FRETENATOR Segment and ratio*

715

716 Fiji <sup>57</sup>, an open source, multiplatform, widely adopted ImageJ<sup>59,60</sup> distribution was chosen as plat-  
717 form to allow the greatest flexibility to users. All plug-ins were developed in jython, using  
718 CLIJ/CLIJ2 <sup>61</sup> to perform image processing directly on the graphics card. On computers with  
719 dedicated graphics cards, this allows fast analysis and modification of the segmentation settings  
720 can be performed through a graphical user interface (Extended Data Fig. 18), with near-real time  
721 segmentation previews. All code is freely available at <https://github.com/JimageJ/ImageJ-Tools>,  
722 along with installation and usage tutorial videos.

723

724 Segmentation steps are illustrated in Extended Data Fig. 19. Preprocessing consists of extracting  
725 the segmentation channel, applying a 3D difference of Gaussian filter to smooth noise and re-  
726 move background. An optional tophat filter allows further background subtraction. A choice of  
727 various automatic methods or manual thresholding is then used to generate a binary map.

728

729 An optional 3D watershed is used to split objects. Because 3D watershed can cause the loss of  
730 too many nuclei ROI or shrink them below their original size, we compare the watershed to non-  
731 watershed binary maps. A map of the 'lost nuclei' is generated, which are added back later.

732

733 A 3D connected components analysis is used to generate a label map of the watershed nuclei. As  
734 a watershed shrinks objects, the labelled objects are dilated (on zero-value pixels only), then  
735 multiplied by the original threshold image. This provides a good segmentation with split objects  
736 without object shrinkage.

737

738 To correct account for any 'lost nuclei' absent from the image, a connected-components analysis  
739 is run on the 'lost nuclei' map, to generate labels which are supplemented back onto the first label  
740 map.

741

742 Once the segmentation is complete, voxels that are saturated on either the **donor excited donor**  
743 **emission** (DxDm), or the **donor excited acceptor emission** (DxA<sub>m</sub>) are excluded from analysis  
744 of both channels and the emission ratio (DxA<sub>m</sub>/DxD<sub>m</sub>) is calculated for each ROI. The segmen-  
745 tation is also used to quantify position, size, donor intensity, acceptor FRET intensity, acceptor  
746 intensity, pixel count, image frame for each ROI, which are exported as a results table along with  
747 file name, ROI identifiers (Extended Data Fig. 20). The following outputs are produced upon  
748 plugin completion: Threshold stack, the Label stack, Emission ratio stack, Emission ratio maxi-  
749 mum Z-projection and Emission ratio nearest-point Z-projection. Please note, to halve the file  
750 size of exported images, emission ratio values are multiplied by 1000 in exported image files, al-  
751 lowing the files to be saved as 16-bit images, instead of 32-bit images.

752

753 A log of segmentation settings is also created every time the *FRETENATOR-Segment and ratio*  
754 plugin is run.

755

756 Development of *FRETENATOR ROI labeller*

757

758 The ROI labeller is a follow on tool for post-segmentation analysis where users can categorize  
759 the ROI in their segmented images (Extended Data Fig. 21). It currently works on single  
760 timepoint 3D label images, allowing users to visually assign labels to one of 10 categories. Re-  
761 sults are either output to an existing results table or can be used to remeasure a chosen image.

762

763 *FRETENATOR* software compatibility

764

765 The majority of testing was performed on a 2017 Dell desktop (Windows 10 Intel i7-6700 CPU  
766 3.41GHz, 32GB RAM, Intel HD Graphics 4000/AMD Radeon R7 450), and a 2014 Gigabyte  
767 laptop (Ubuntu Intel i7-4710Q 2.5GHz Quad core, 16GB RAM, Nvidia GTX 860M 4gb) on  
768 which the software runs well. We regularly use the software on various Windows, Linux and  
769 Mac machines of varying ages and specifications. Considerable speed increases are present on  
770 modern hardware with fast graphics memory. Dozens of Arabidopsis cotyledon z-stacks have  
771 been tested.

772

773 *FRETENATOR* validation (comparison with *Imaris 8.2*)

774

775 *FRETENATOR* segment and ratio analysis was compared to the commercial software *Imaris 8.2*  
776 (<https://imaris.oxinst.com/>) for validation and to ensure comparable results. Buffer exchange and  
777 segmentation were performed as previously described<sup>26,62</sup>. Segmentation in *Imaris* was per-  
778 formed using the surfaces wizard on the AxAm channel, with background subtraction and object  
779 splitting. The XTMeanIntensityRatio Xtension was used for emission ratio calculation.

780

781 *FRETENATOR* and IMARIS gave extremely close results in terms of both segmentation and  
782 quantification of emission ratio (Extended Data Fig. 22.). As *FRETENATOR* is free, quick to use  
783 and can be installed on old, low-specification computer hardware, *FRETENATOR* was used for  
784 subsequent biosensor analysis.

785

786

787 Image analysis using *FRETENATOR*



788

789 All segmentation and labeling were performed with the *FRETENATOR* plugins. Segmentation  
790 settings were optimized for each experiment but kept constant within each experiment. The  
791 AxAm channel was used for segmentation. Watershed was used for the dense nuclei of the root  
792 tip but switched off for leaf imaging. Difference of Gaussian kernel size was determined empiri-  
793 cally, due to different magnifications, resolutions and amount of noise. As a default, Otsu thresh-  
794 olds were used for segmentation, but in experiments where this gave poor segmentation, a man-  
795 ual threshold would be used the dataset (the same value for each image in the dataset).

796

797 For Rootchip timecourses, roots were registered in Fiji using the ‘Correct 3D drift’ plugin <sup>63</sup> be-  
798 fore analysis.

799

800 For Lightsheet images, viewpoints were combined in Fiji <sup>57</sup> using the Multiview reconstruction  
801 plugin <sup>58</sup>. Rolling ball background subtraction (Fiji: subtract background) was performed before  
802 processing with *FRETENATOR*.

### 803 Statistical analyses and reproducibility

804 All statistical tests are described in the figure legends, along with sample size. Central lines  
805 indicate median and variation indicates interquartile range in box-and-whisker plots. Whiskers  
806 indicate the range. Diamonds indicate outliers.

807

### 808 **Acknowledgments**

809 We would like to thank Eiji Nambara for kindly providing the *cyp707a1cyp707a3* seed and  
810 Malcolm Bennett and Poonam Mehra for providing the *snrk2.2snrk2.3*, *snrk2.2snrk2.3*  
811 RCH1pro::SnRK2.2 and *snrk2.2snrk2.3* SnRK2.2pro::SnRK2.2 lines and for comments on the  
812 manuscript. Thanks to Farhat Nazir, Hugo Caumon and Rui Albuquerque-Martins for help at  
813 various stages of the project. Thanks to Raymond Whiteman, Gareth Evans and Laurel Tully for  
814 their help with microscopy and horticulture. This work was funded by the Gatsby Charitable  
815 Foundation and Biotechnology and Biological Sciences Research Council (BB/P018572/1).

816

817

818

## 819 **Contributions**

820 AMJ conceived of the project. AMJ, JR, MGG, RW, KS and SC designed biosensor mutations.  
821 JR, RW and MGG made DNA constructs. MGG and RW performed *in vitro* biosensor screening.  
822 JR generated plant lines, JR, MER and ML performed imaging experiments. JR performed  
823 phenotyping experiments. ML performed constructed the SPIM microscope and appropriate  
824 software. JR wrote FRETENATOR image analysis software. JR and MER performed image  
825 analysis. JR, MGG and MER analysed data and performed statistics. Protein structure prediction  
826 was performed by JR.

## 827 **Ethics declarations**

## 828 **Competing interests**

829 Authors declare that they have no competing interests

## 830 **Data and materials availability**

831 New plant lines will be deposited at the Nottingham Arabidopsis Stock Centre. Binary vectors  
832 for ABACUS2 transformation as plant ABACUS2 constructs in pENTR221-f1 will be deposited  
833 at Addgene. All data has been placed Cambridge data repository. The FRETENATOR image  
834 analysis toolset, as well as installation and usage instructions are available at  
835 <https://github.com/JimageJ/ImageJ-Tools>.

836

837

838

839
